# Supplementary material for: Disruption of the circadian clock drives Apc loss of heterozygosity to accelerate colorectal cancer
Source: PubMed Central journal article supplement (PMC9365282; doi:10.1126/sciadv.abo2389), 2022-08-10
Supplement: sciadv.abo2389_sm.pdf [file sciadv.abo2389_sm.pdf]

Supplementary Materials for  
**Disruption of the circadian clock drives *Apc* loss of heterozygosity to  
accelerate colorectal cancer**

Sung Kook Chun *et al.*

Corresponding author: Selma Masri, [smasri@uci.edu](mailto:smasri@uci.edu)

*Sci. Adv.* **8**, eabo2389 (2022)  
DOI: 10.1126/sciadv.abo2389

**This PDF file includes:**

Figs. S1 to S10  
Table S1

# Supplementary Figure 1: Chun, Fortin, Fellows et al.

- WT
- *Bmal1*<sup>-/-</sup>
- ▲ *Apc*<sup>+/-</sup>
- ▼ *Apc*<sup>+/-</sup>; *Bmal1*<sup>-/-</sup>

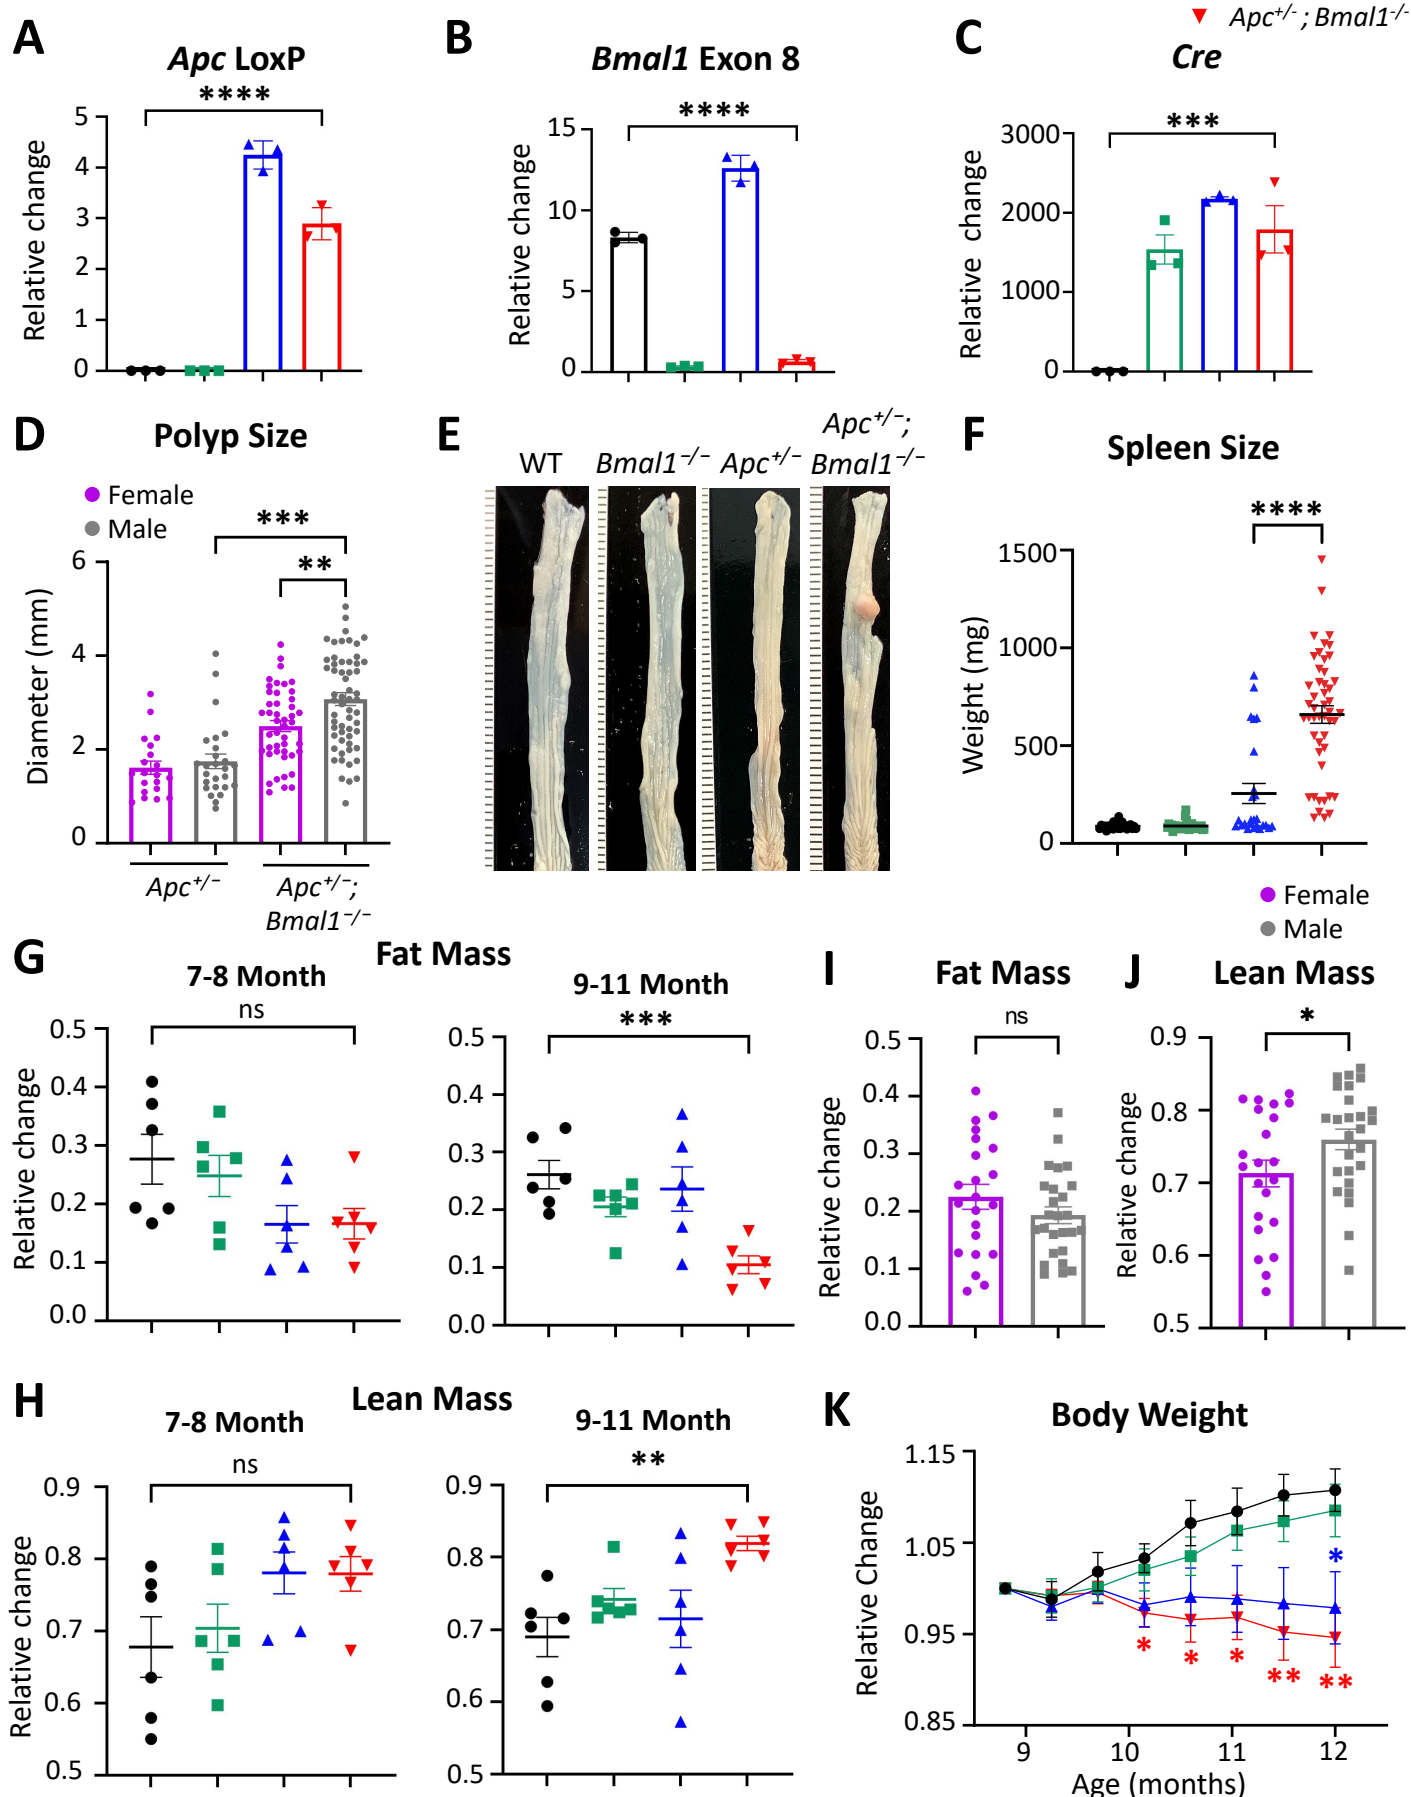



Supplementary Figure 2: Chun, Fortin, Fellows et al.

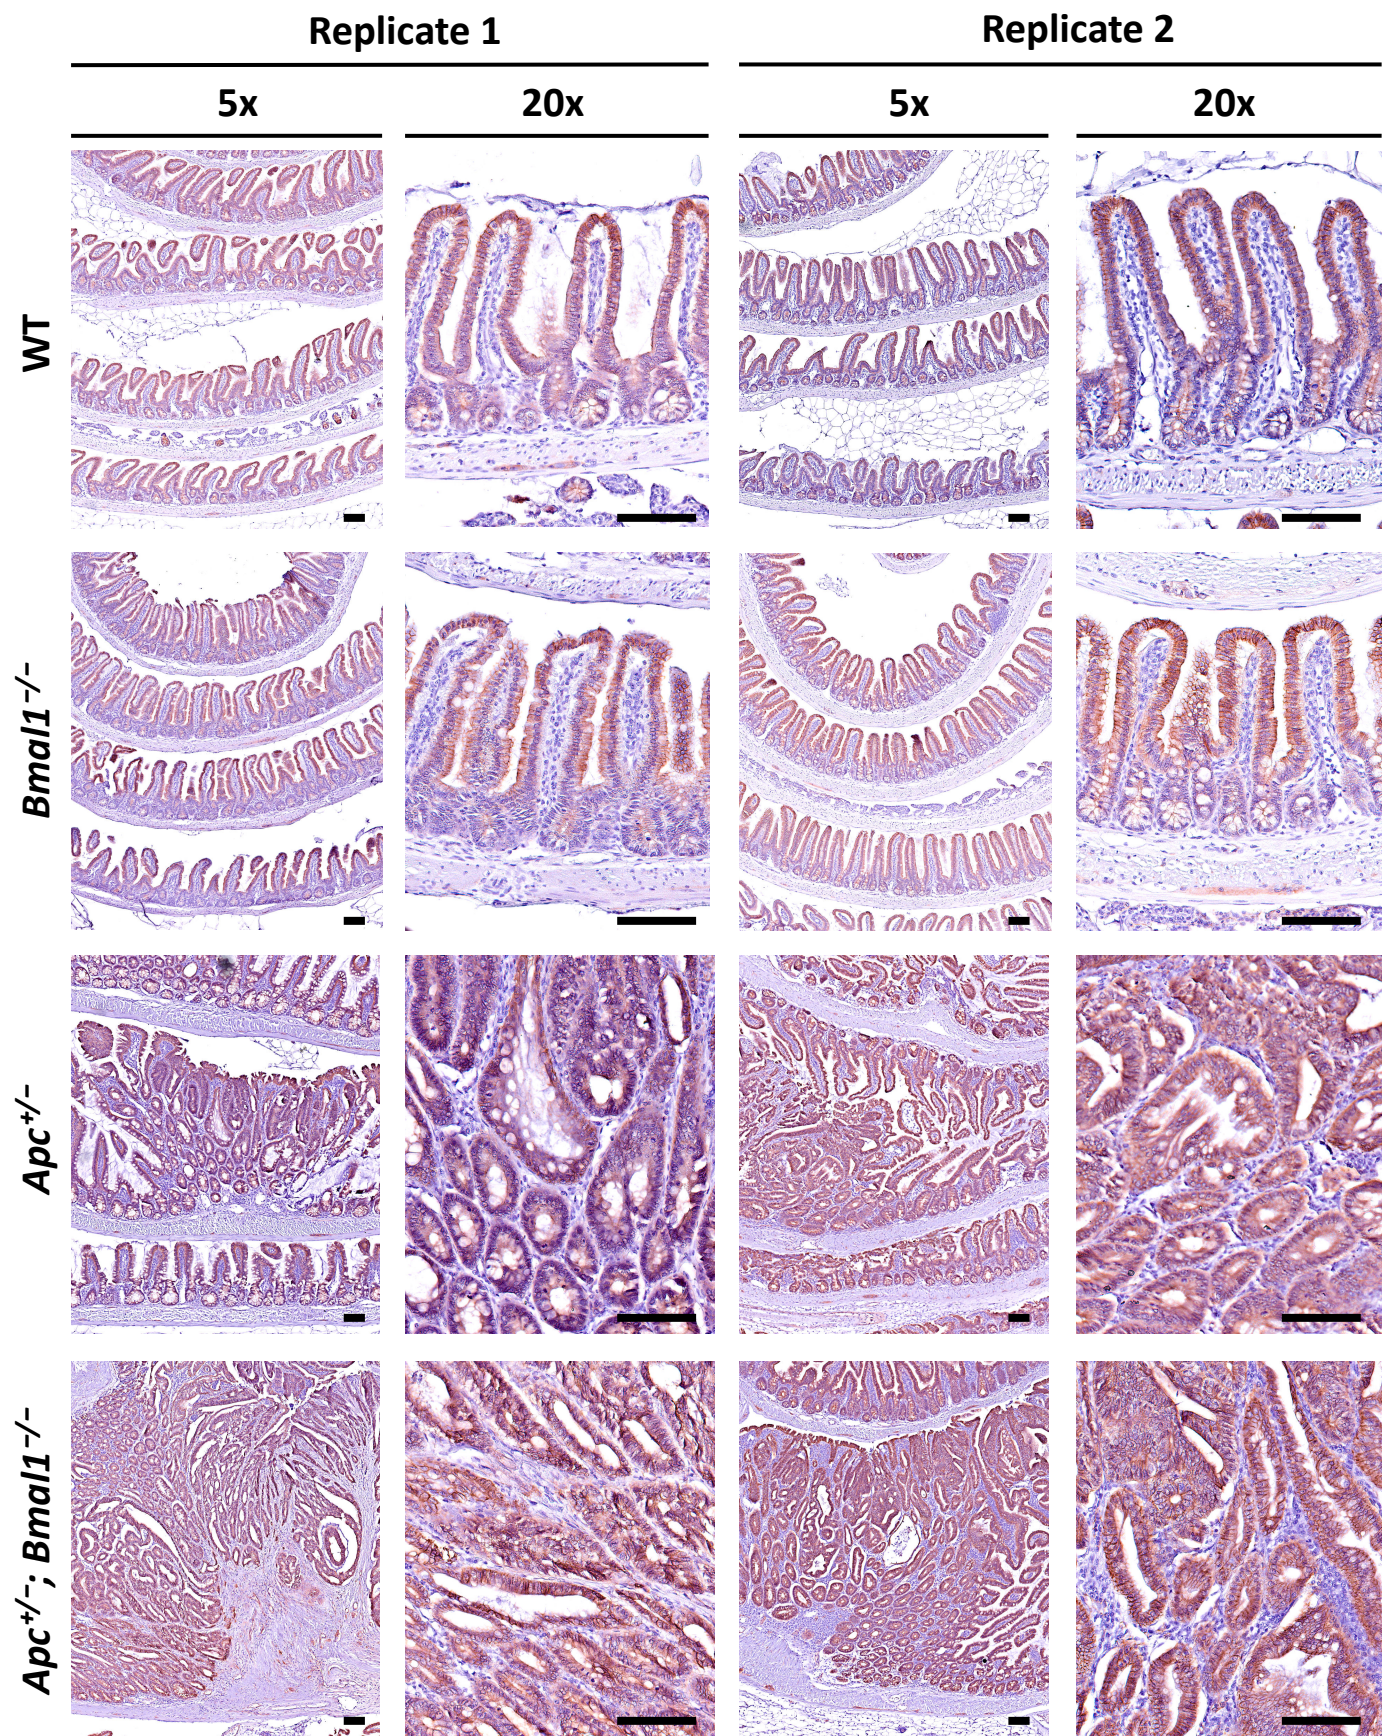



# Supplementary Figure 3: Chun, Fortin, Fellows et al.

● WT  
 ■ *Bmal1*<sup>-/-</sup>  
 ▲ *Apc*<sup>+/-</sup>  
 ▼ *Apc*<sup>+/-</sup>; *Bmal1*<sup>-/-</sup>

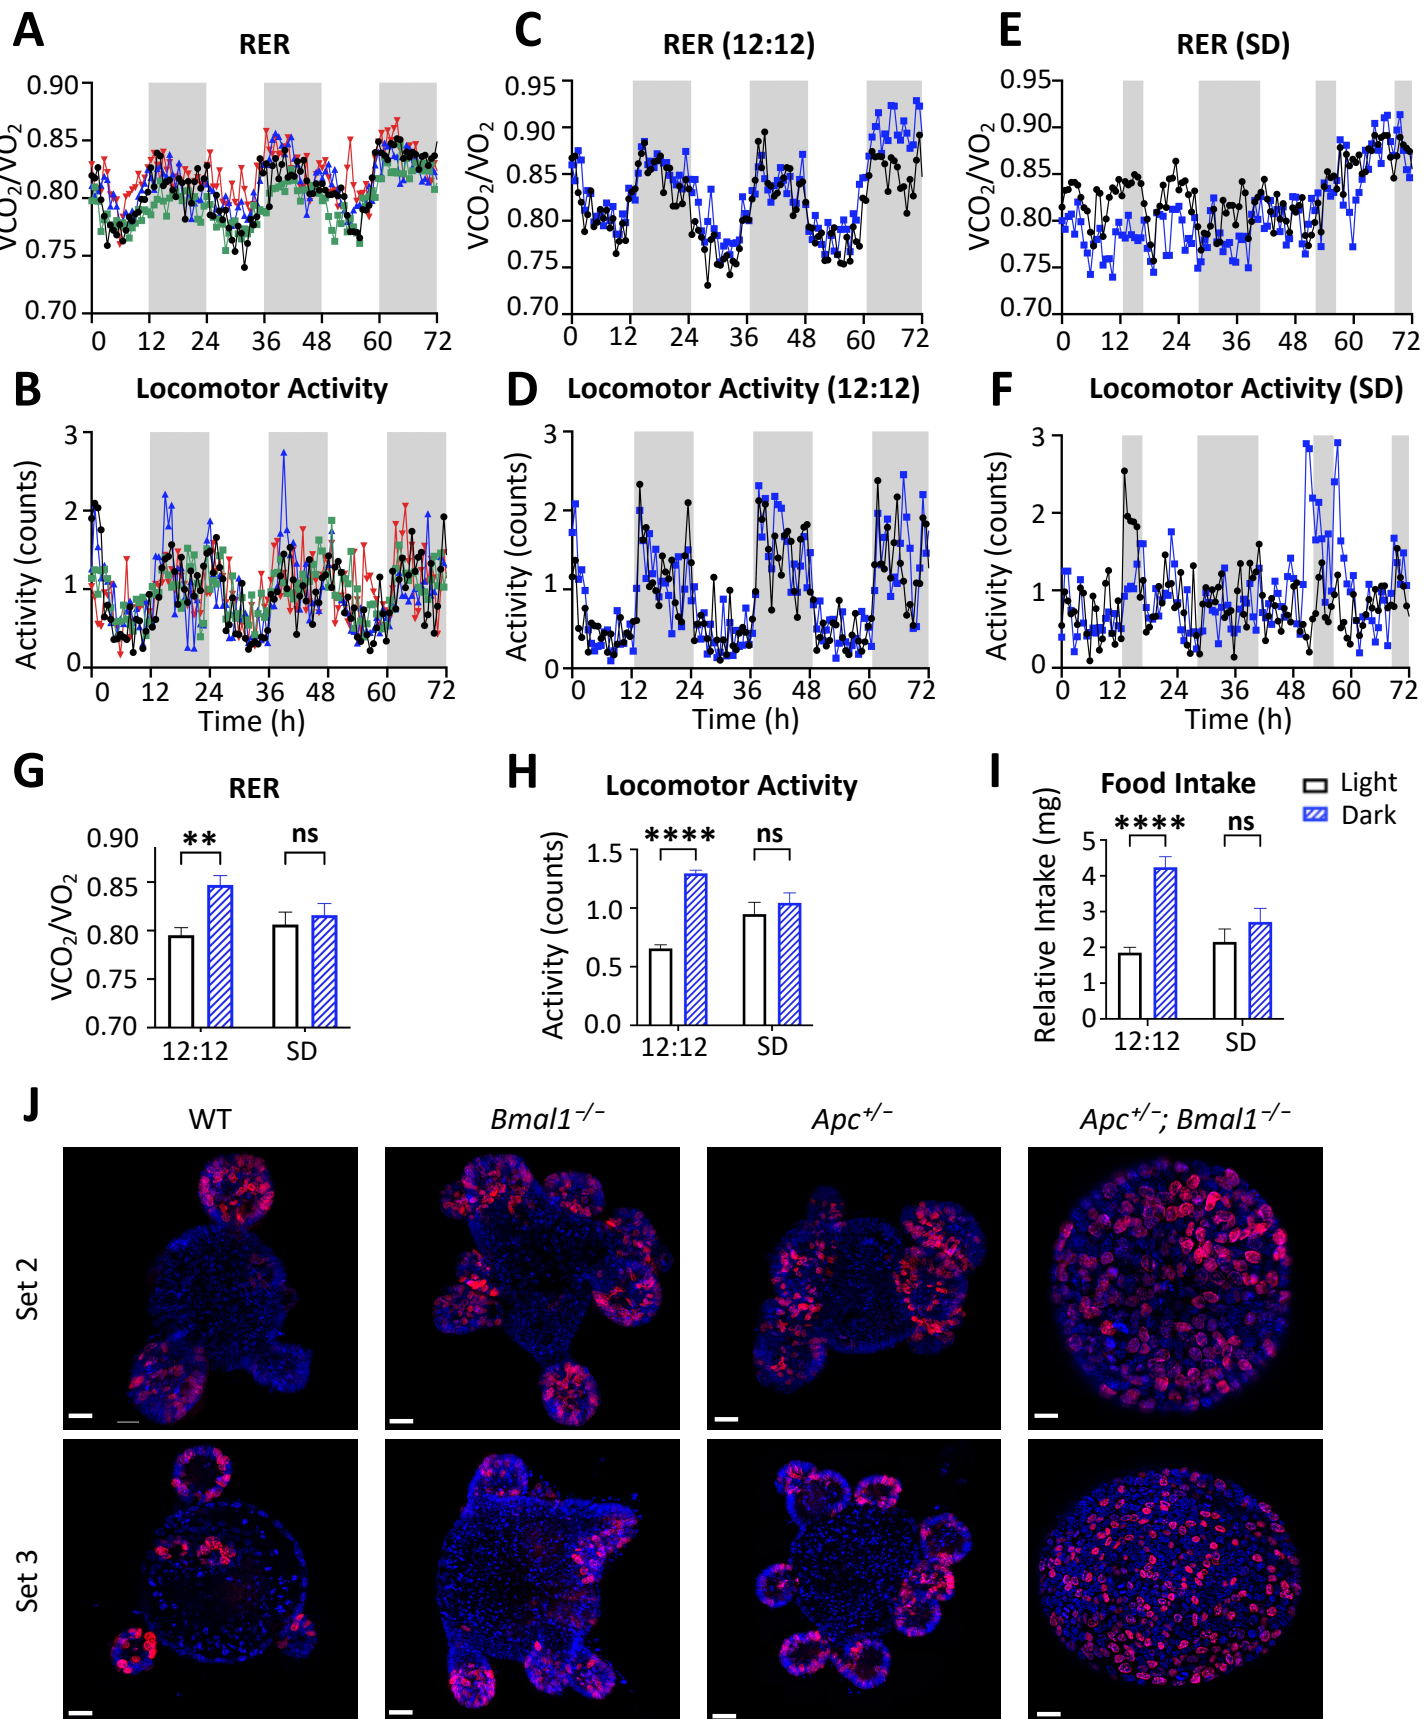

# Supplementary Figure 4: Chun, Fortin, Fellows et al.

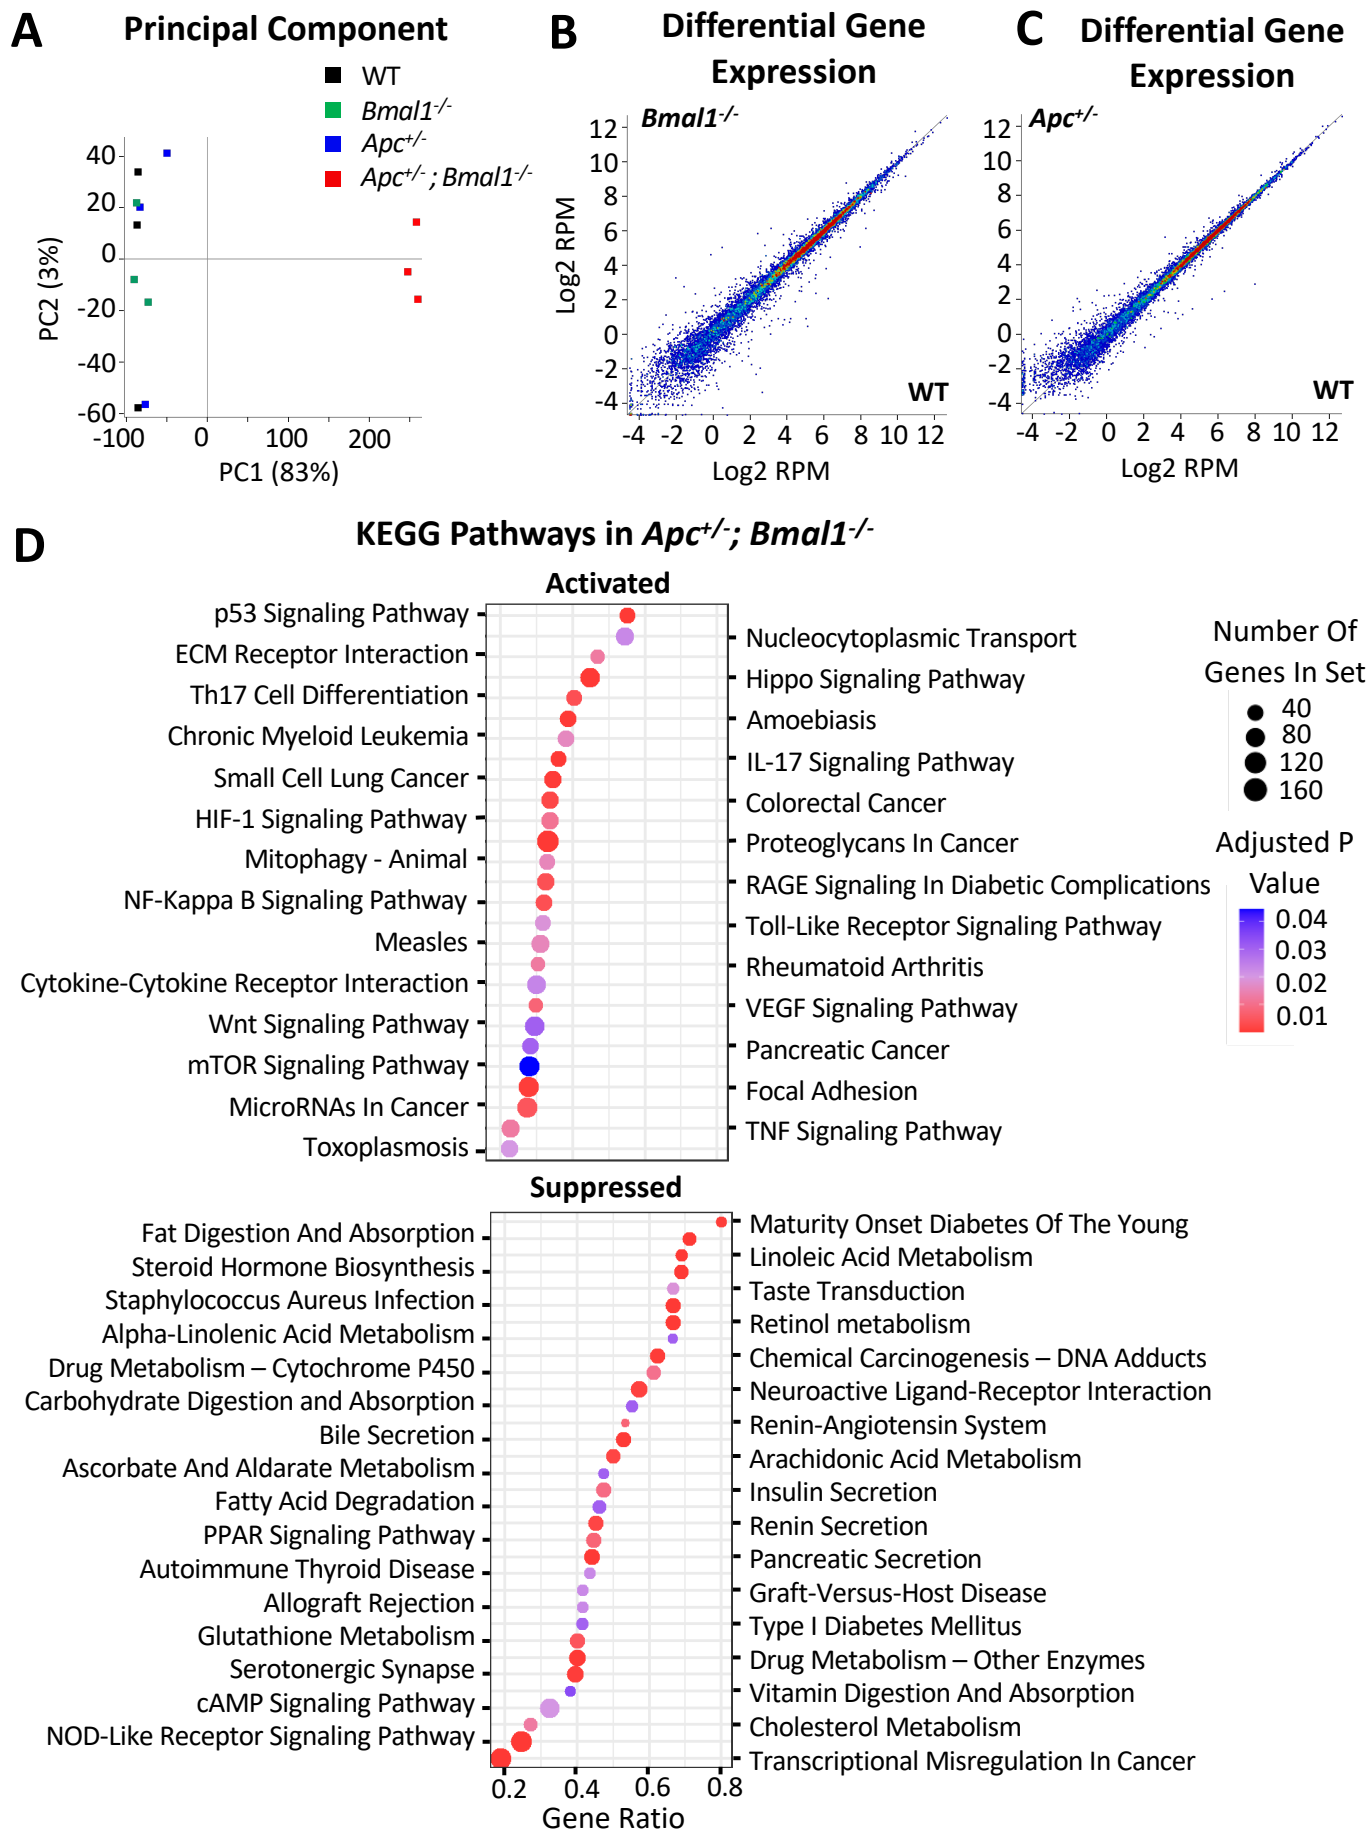

# Supplementary Figure 5: Chun, Fortin, Fellows et al.

## A Differential Gene Expression

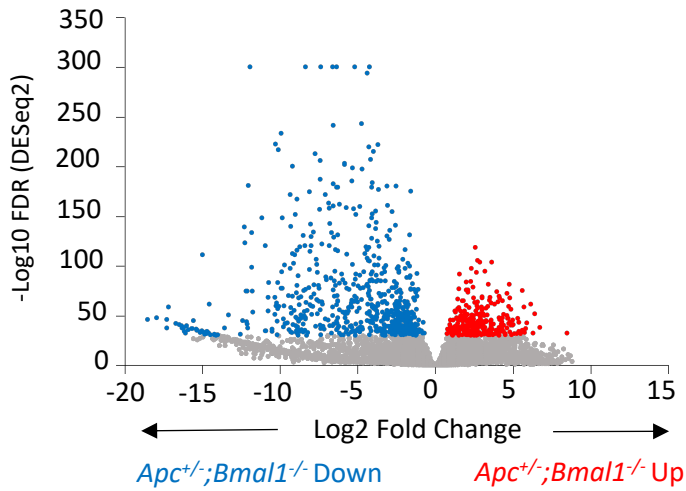

## C DEG in Glycolysis & Glutaminolysis

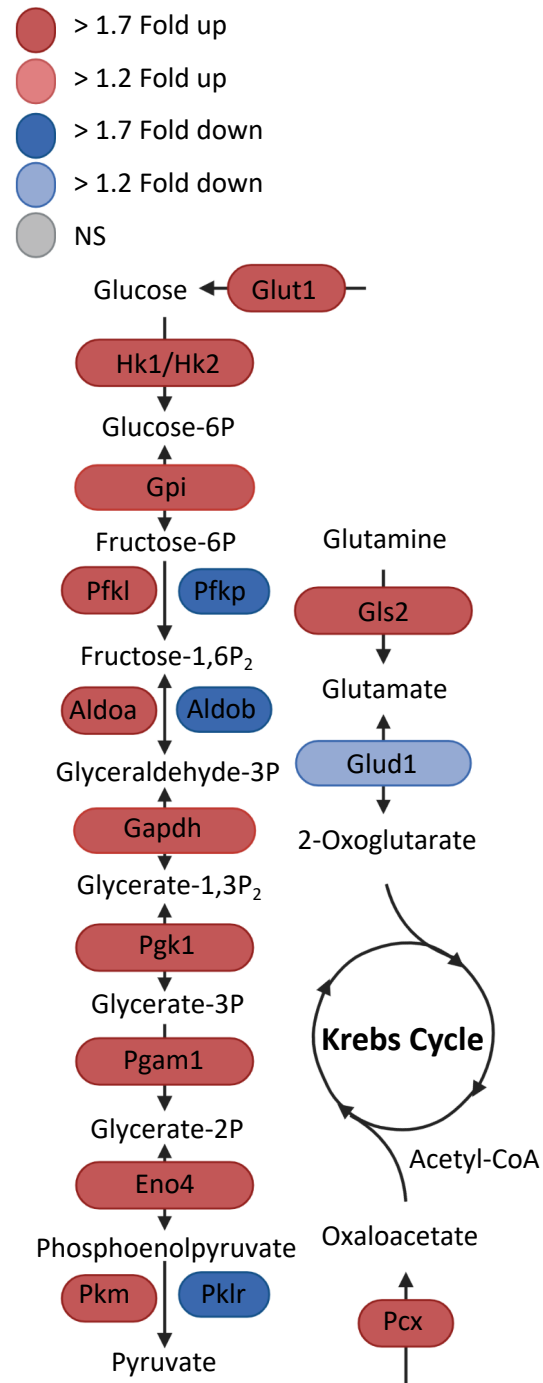

## B DEG in DNA Repair

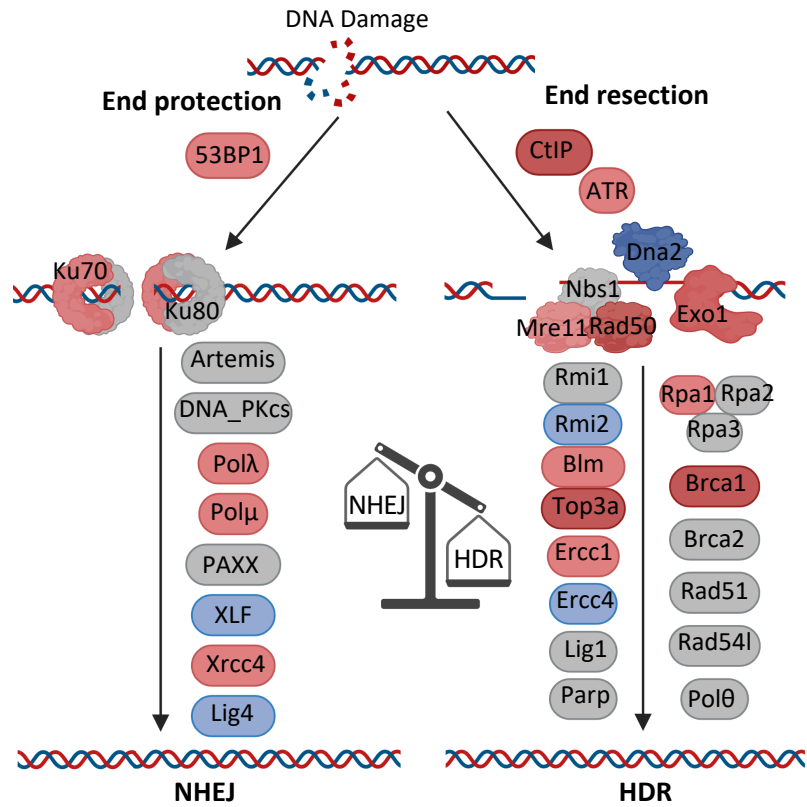

# Supplementary Figure 6: Chun, Fortin, Fellows et al.

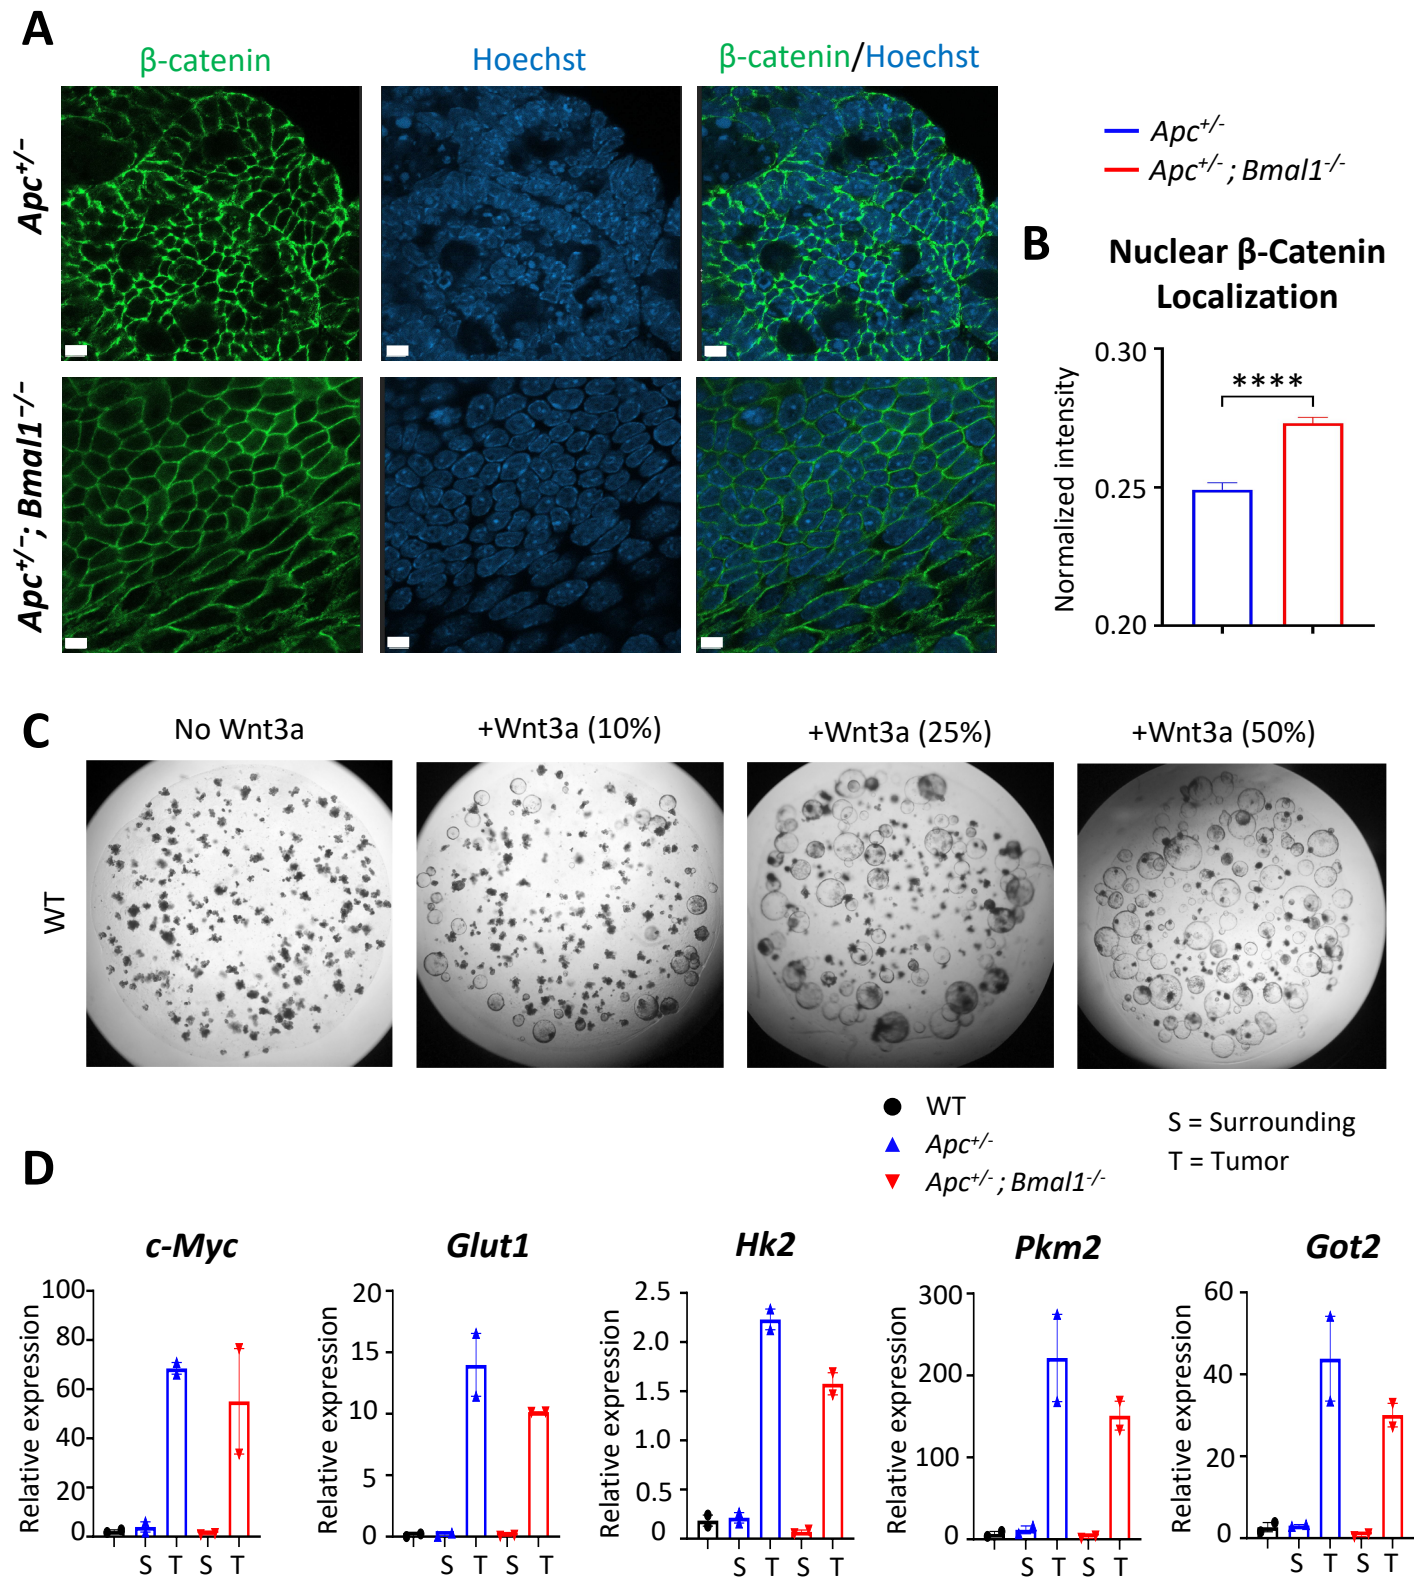



# Supplementary Figure 7: Chun, Fortin, Fellows et al.

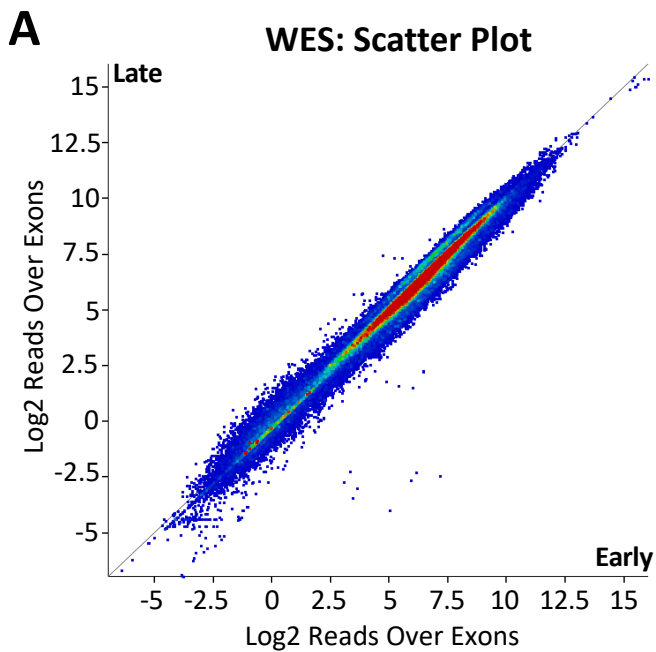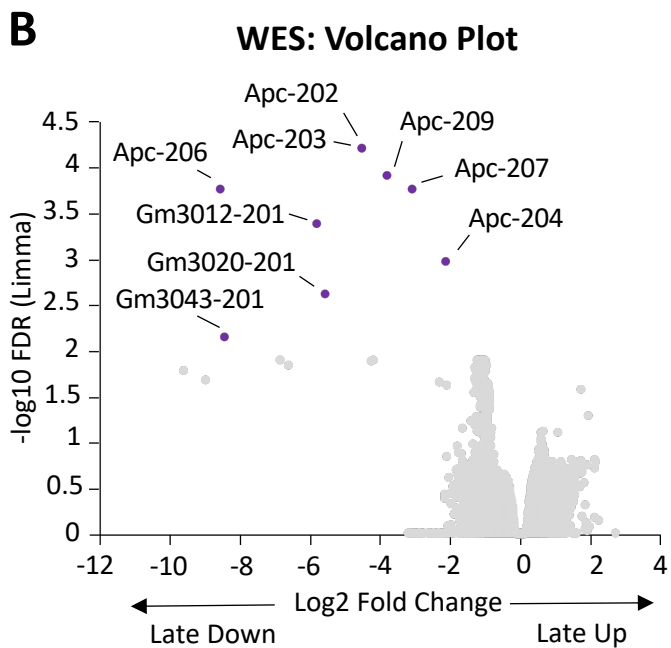

**C**

| Gene          | Mutations in <i>Apc</i> <sup>+/-</sup> ; <i>Bmal1</i> <sup>-/-</sup> Organoids |       |   |                     | DEG  | Signaling Pathway               |
|---------------|--------------------------------------------------------------------------------|-------|---|---------------------|------|---------------------------------|
|               | 1                                                                              | 2     | 3 | 4                   |      |                                 |
| <i>Apc</i>    | -                                                                              | -     | - | -                   | Down | Wnt                             |
| <i>Ctnnb1</i> | -                                                                              | -     | - | -                   | -    |                                 |
| <i>Axin2</i>  | -                                                                              | -     | - | -                   | Up   |                                 |
| <i>Trp53</i>  | -                                                                              | -     | - | L302R               | Up   | Ret, G1/S checkpoint, apoptosis |
| <i>Kras</i>   | -                                                                              | -     | - | -                   | Down | Ras/Raf/Mapk                    |
| <i>Nras</i>   | -                                                                              | -     | - | -                   | Up   |                                 |
| <i>Hras</i>   | -                                                                              | -     | - | -                   | Up   |                                 |
| <i>Braf</i>   | -                                                                              | A731V | - | -                   | -    |                                 |
| <i>Raf1</i>   | -                                                                              | -     | - | -                   | Down |                                 |
| <i>Myc</i>    | -                                                                              | -     | - | V239G, T247P, S250R | Up   | Notch, Erk and Mapk             |
| <i>Smad4</i>  | -                                                                              | -     | - | -                   | Up   | TGF- $\beta$ , Bmp              |
| <i>Tgfbr1</i> | -                                                                              | -     | - | E106*               | -    | PI3K/AKT, TGF- $\beta$          |
| <i>Tgfbr2</i> | -                                                                              | -     | - | -                   | Up   |                                 |
| <i>Pik3ca</i> | -                                                                              | -     | - | -                   | -    | PI3K/AKT                        |
| <i>Pten</i>   | -                                                                              | -     | - | S398T               | Up   |                                 |
| <i>Dcc</i>    | -                                                                              | -     | - | -                   | -    | Netrin-1                        |
| <i>Egfr</i>   | -                                                                              | -     | - | -                   | Up   | RAS/RAF/MAPK and PI3K/AKT       |
| <i>Cdkn2a</i> | -                                                                              | -     | - | -                   | Up   | Cell cycle                      |
| <i>Cdkn2b</i> | -                                                                              | -     | - | -                   | Down |                                 |

# Supplementary Figure 8: Chun, Fortin, Fellows et al.

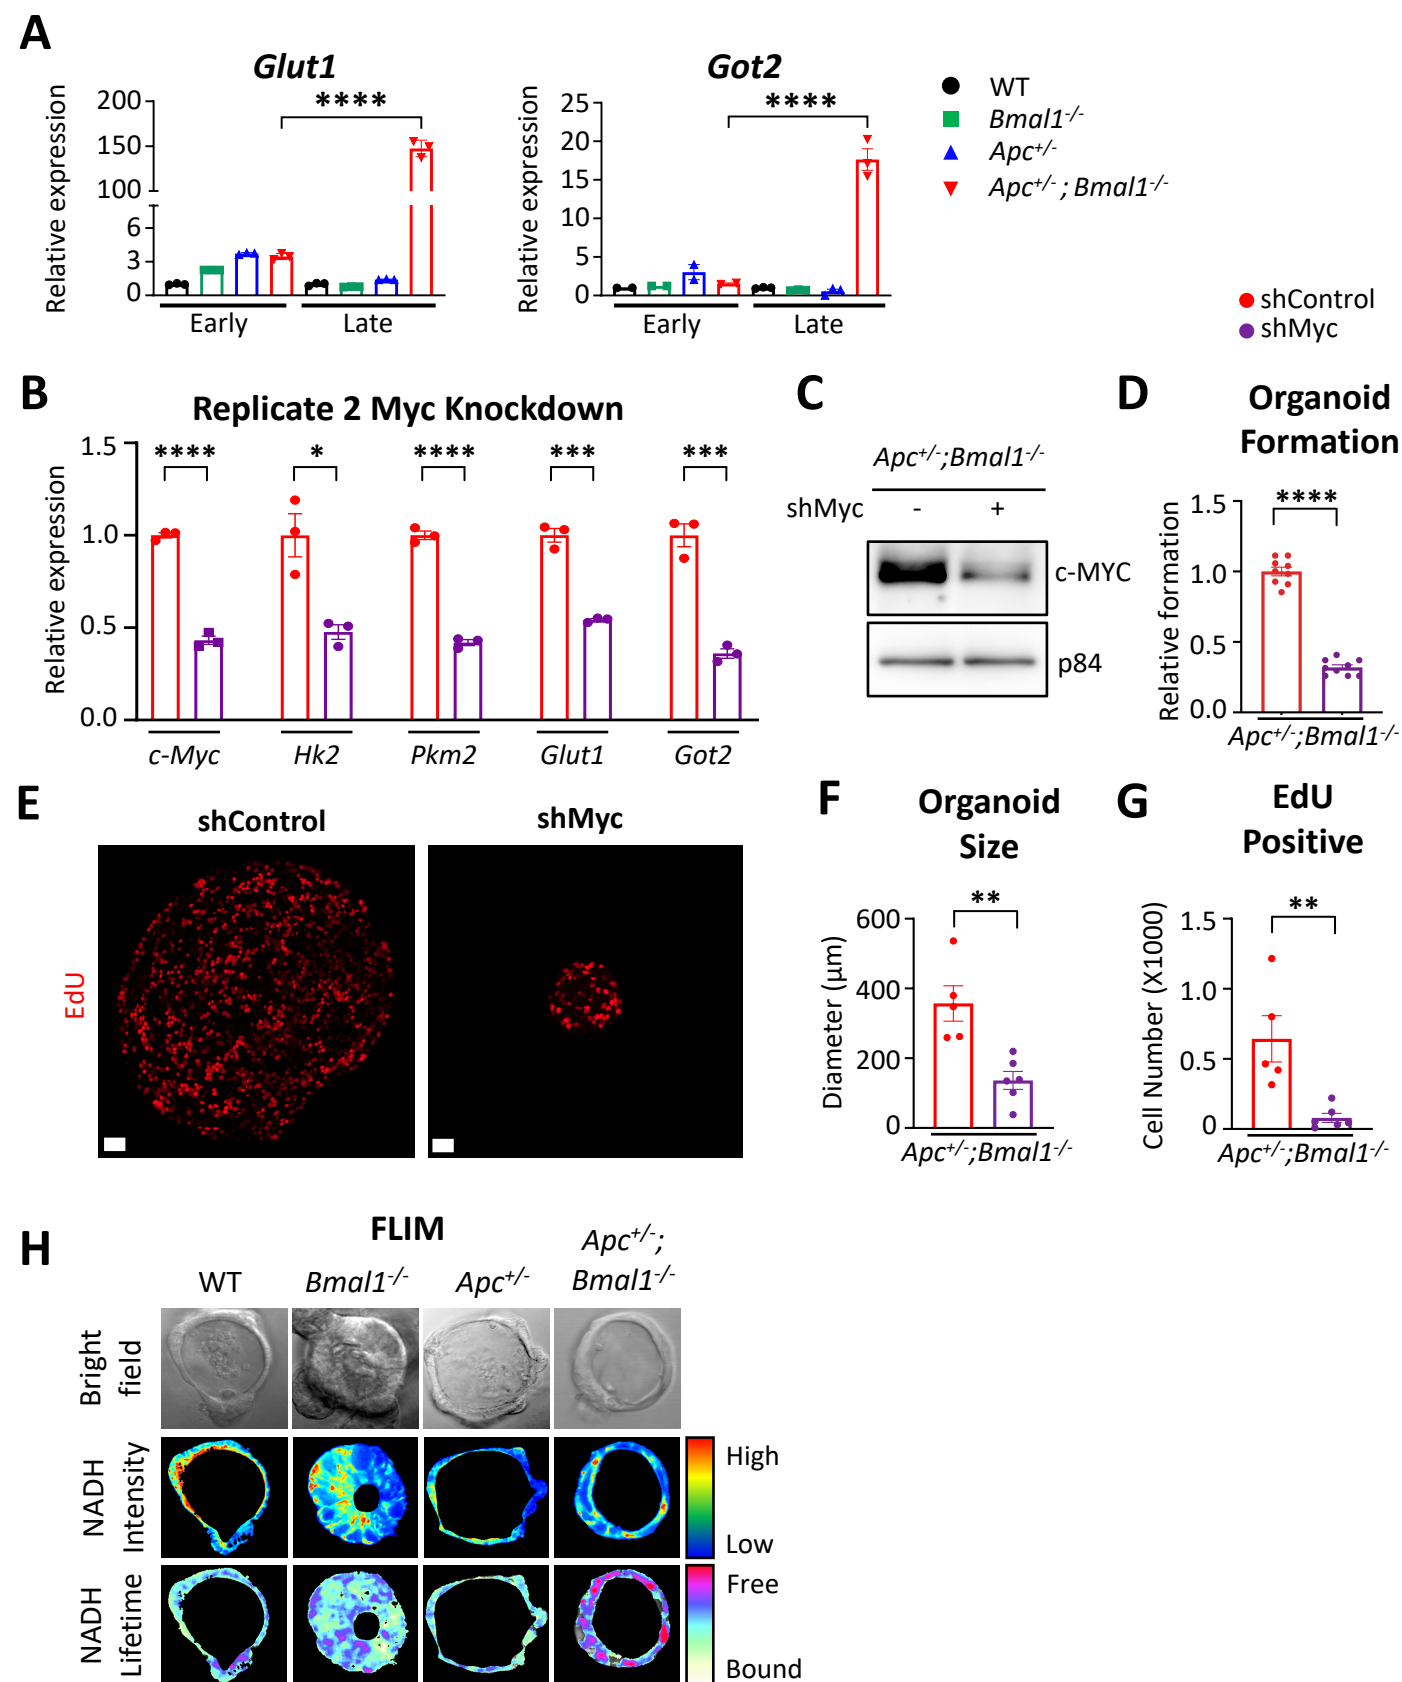

**A**

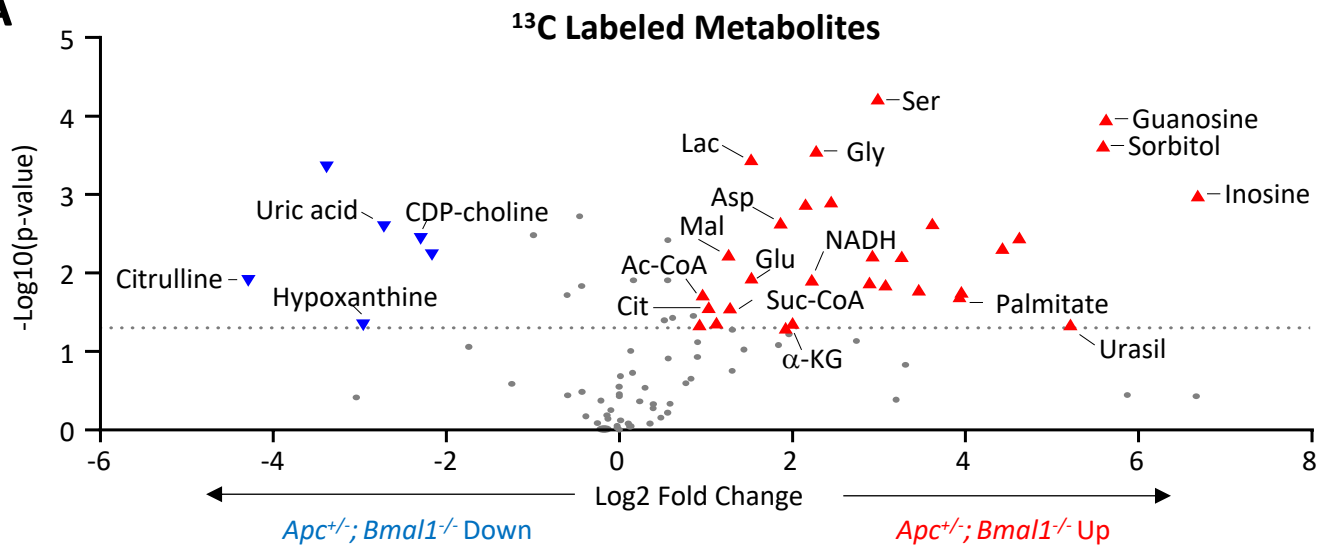

**B**

**Relative Amounts of Metabolites**

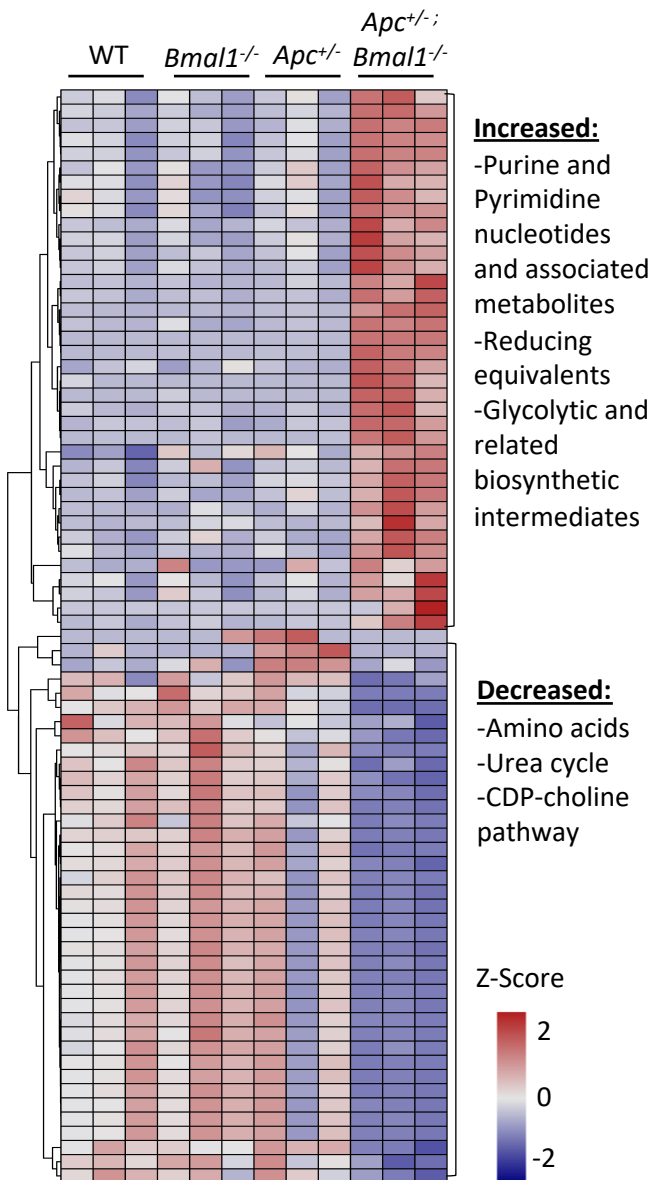

**C**

**Organoid Formation**

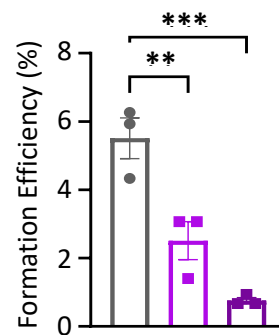

**D**

**Glucose Uptake**

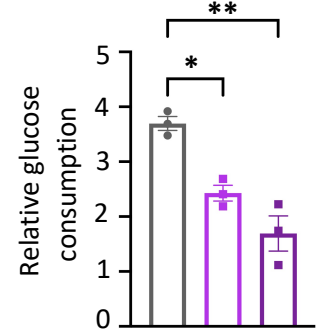

**E**

**Organoid Formation**

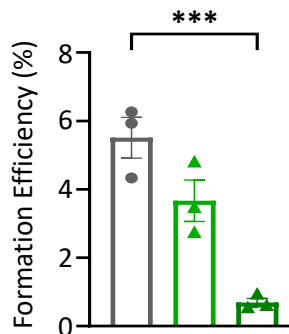

**F**

**Glucose Uptake**

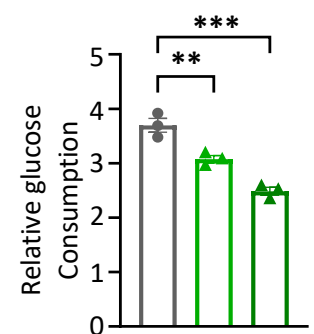



# Supplementary Figure 10: Chun, Fortin, Fellows et al.

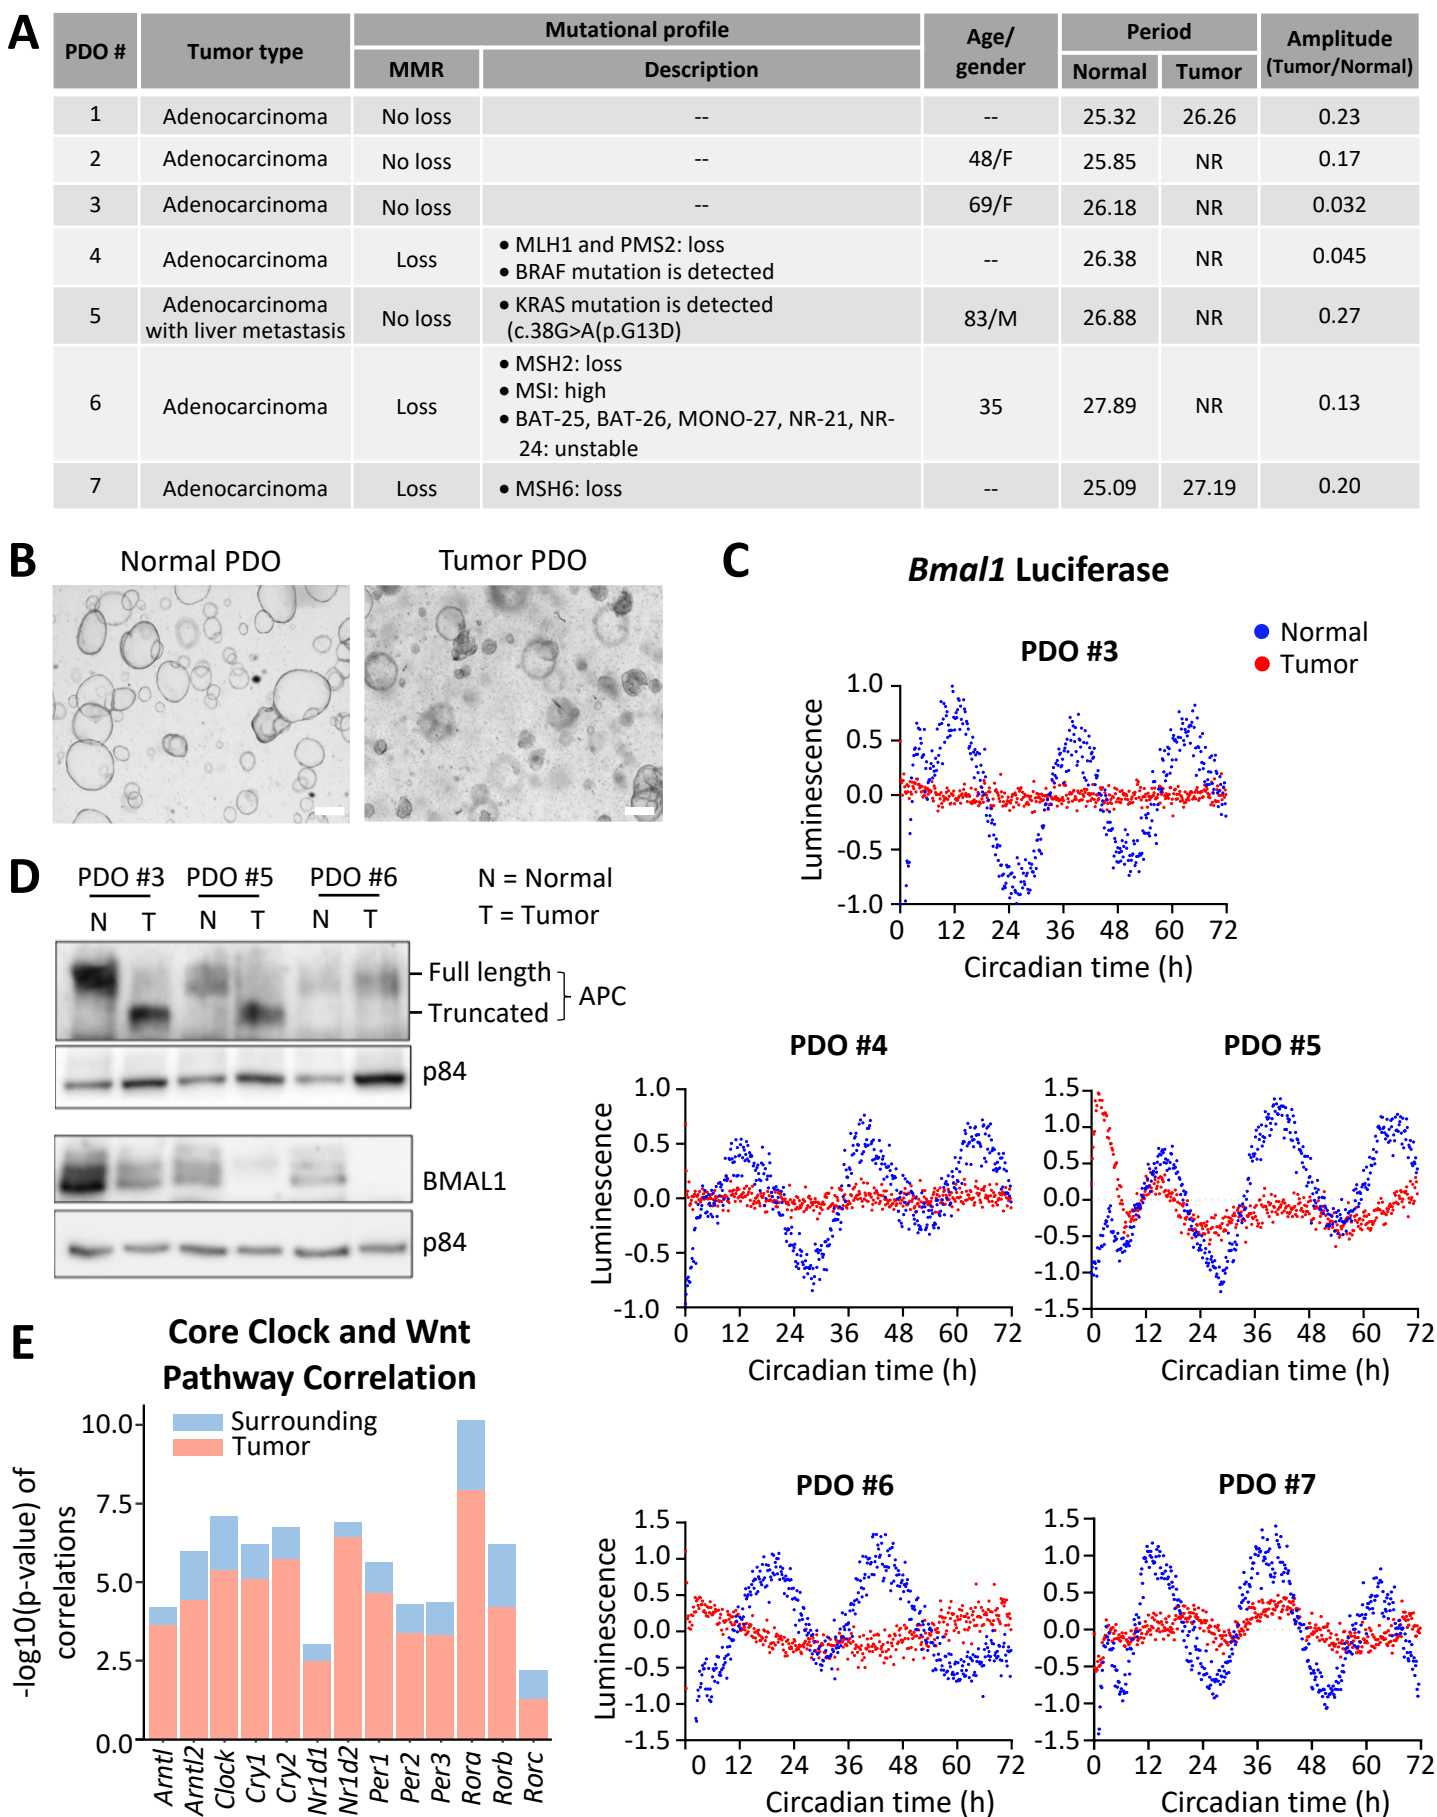

**Table 1: Primer and Probe Information.****Primer and probe information used for qPCR and dPCR experiments.**

| <b>qPCR Primer Name</b> | <b>Primer Sequence</b>          |
|-------------------------|---------------------------------|
| Apc mRNA Fwd            | 5'-GCTCCTCGAAGGTTGACAAG-3'      |
| Apc mRNA Rev            | 5'-CTGTCTGGGAGCTGGACAT-3'       |
| Axin2 mRNA Fwd          | 5'-TGTCCTGGGGGAACAGATTA-3'      |
| Axin2 mRNA Rev          | 5'-TTTTGGCAAGGTACCACCTC-3'      |
| C-myc mRNA Fwd          | 5'-AGCTCGCCCAAATCCTGTAC-3'      |
| C-myc mRNA Rev          | 5'-TTGTGCTGGTGTGAGTGGAGAC-3'    |
| Gls2 mRNA Fwd           | 5'-CAGGAGCGTATCCCTATCCA-3'      |
| Gls2 mRNA Rev           | 5'-GCTGCATCTTGCTCATGC-3'        |
| Got2 mRNA Fwd           | 5'-CGTTACCGAAGCCTTCAAGA-3'      |
| Got2 mRNA Rev           | 5'-GGGCAGGTATTCTTTGTCCA-3'      |
| Hk2 mRNA Fwd            | 5'-CAACTCCGGATGGGACAG-3'        |
| Hk2 mRNA Rev            | 5'-CACACGGAAGTTGGTTCCTC-3'      |
| Pkm2 mRNA Fwd           | 5'-CTCCTTCAAGTGTGTCAGTG-3'      |
| Pkm2 mRNA Rev           | 5'-CAGTCTGGGGATTTGAGTC-3'       |
| Slc2a1 mRNA Fwd         | 5'-TTGTTGTAGAGCGAGCTGGA-3'      |
| Slc2a1 mRNA Rev         | 5'-ACCAGGGCCTACTTCAAAGA-3'      |
| Slc7a5 mRNA Fwd         | 5'-ATGACGCTGATGTACGCCTT-3'      |
| Slc7a5 mRNA Rev         | 5'-CGGAGCCACATCATACCGAT-3'      |
| Survivin mRNA Fwd       | 5'-GAACCCGATGACAACCCGAT-3'      |
| Survivin mRNA Rev       | 5'-TTGGCTCTGTCTGTCCAG-3'        |
| Wnt3a mRNA Fwd          | 5'-ACACTTGAGCAGAACGGATACA-3'    |
| Wnt3a mRNA Rev          | 5'-TGGATACAGCAGTTGGTAGG-3'      |
| Apc Lox P Fwd           | 5'-ATGTACCTGACTGATGAAGTTCCTA-3' |
| Apc Lox P Rev           | 5'-CCTCGAGGTCGACGGTAT-3'        |
| Bmal1 Exon 8 Fwd        | 5'-AGGCCACAGTCAGATTGAA-3'       |
| Bmal1 Exon 8 Rev        | 5'-GCTGAACAGCCATCCTTAGC-3'      |
| Cre Fwd                 | 5'-CCATCTGCCACCAGCCAG-3'        |
| Cre Rev                 | 5'-TCGCCATCTTCCAGCAGG-3'        |
| Per1 Fwd                | 5'-ATCCTGATCGCATTGGCTGACTGA-3'  |
| Per1 Rev                | 5'-TCTCTTCTGGCATCTGATTGGCT-3'   |

| <b>dPCR Primer/Probe Name</b>                           | <b>Primer Sequence</b>                      |
|---------------------------------------------------------|---------------------------------------------|
| <i>Apc</i> Fwd                                          | 5'-GAAAGTGGAGGTGGGATA-3'                    |
| <i>Apc</i> Rev                                          | 5' GTGGTCTTCGTTTGTAGC-3'                    |
| <i>Apc</i> FAM Probe                                    | 5'-/56-FAM/GGAA+TGTGTCCAGCT+TGA/3IABkFQ/-3' |
| <i>ApoB</i> Primer Probe Mix (Biorad)                   | Region: Mm39   chr18:34354047-34354169      |
| <i>Tfrc</i> Primer Probe Mix (Thermo Fisher Scientific) | Region: Mm37   chr16:32626732-32626823      |

## Supplementary Figure legends

### **Supplementary Figure 1: Disruption of *Bmal1* accelerates intestinal tumorigenesis *in vivo*. (A)**

Verification of loxP sites within the *Apc* locus by qPCR using gDNA isolated from IECs of WT, *Bmal1*<sup>-/-</sup>, *Apc*<sup>+/-</sup>, and *Apc*<sup>+/-</sup>;*Bmal1*<sup>-/-</sup> mice. **(B)** qPCR confirmation of *Bmal1* exon 8 floxed allele using IEC gDNA. **(C)** Validation of Cre using qPCR in IEC gDNA. **(D)** Scatter plot of small intestinal polyp sizes from *Apc*<sup>+/-</sup> and *Apc*<sup>+/-</sup>;*Bmal1*<sup>-/-</sup> mice divided by gender (n=4 mice/gender/genotype). **(E)** Representative images of linearized colon tissue from all GEMMs. **(F)** Scatter plot of spleen weights from 28 WT, 31 *Bmal1*<sup>-/-</sup>, 25 *Apc*<sup>+/-</sup>, and 48 *Apc*<sup>+/-</sup>;*Bmal1*<sup>-/-</sup> mice. **(G)** Fat mass and **(H)** lean mass measurements relative to body weight from 7-8 month or 9-11 month old mice (n=6 mice/genotype). **(I)** Fat mass and **(J)** lean mass relative to body weight for each gender (n=22 females, n= 26 males). **(K)** Body weight measurements of mice normalized to individual mouse starting weight (n=10 mice/genotype). Statistical significance was determined by one-way ANOVA for G and H, Student's unpaired t-test for I and J, and two-way ANOVA with Tukey's multiple comparisons for K. For K, significant multiple comparisons for WT versus *Apc*<sup>+/-</sup>;*Bmal1*<sup>-/-</sup> are shown in red and WT versus *Apc*<sup>+/-</sup> are shown in blue. Asterisks represent p-values from the t-test or multiple comparisons, with \* indicating a p-value of < 0.05, \*\* a p-value of < 0.01, \*\*\* a p-value of < 0.001, \*\*\*\* a p-value of < 0.0001, and ns = not significant.

**Supplementary Figure 2:  $\beta$ -Catenin IHC staining *in vivo*.** IHC was performed for  $\beta$ -Catenin with a hematoxylin counterstain on sectioned small intestinal swiss rolls from WT, *Bmal1*<sup>-/-</sup>, *Apc*<sup>+/-</sup>, and *Apc*<sup>+/-</sup>;*Bmal1*<sup>-/-</sup> mice. 5x and 20x magnifications are shown for two biological replicates for each of the four genotypes. Scale bar = 100  $\mu$ m.

### **Supplementary Figure 3: Indirect calorimetry of GEMM and cellular analysis of organoid model.**

**(A)** RER and **(B)** locomotor activity generated by Phenomaster metabolic cages from mice. WT n=4, *Bmal1*<sup>-/-</sup> n=6, *Apc*<sup>+/-</sup> n=5, and *Apc*<sup>+/-</sup>;*Bmal1*<sup>-/-</sup> n=4. **(C)** RER and **(D)** locomotor activity from WT and *Apc*<sup>+/-</sup> mice maintained in 12:12 conditions. WT n=6, *Apc*<sup>+/-</sup> n=6. **(E)** RER and **(F)** locomotor activity from WT and *Apc*<sup>+/-</sup> mice maintained in SD conditions. WT n=6, *Apc*<sup>+/-</sup> n=6. Quantification

of **(G)** RER, **(H)** locomotor activity, and **(I)** food intake normalized to body weight of 12:12 and SD mice. **(J)** EdU incorporation in WT, *Bmal1*<sup>-/-</sup>, *Apc*<sup>+/-</sup>, and *Apc*<sup>+/-</sup>;*Bmal1*<sup>-/-</sup> organoids (n=2 independent organoid lines). Merged channels of EdU (red) and Hoechst (blue) were taken on Zeiss Elyra 7 Super-Resolution Confocal Microscope. Scale bar = 20 μm. Data represent the mean ± SEM and statistical significance was determined by one-way ANOVA with Tukey's multiple comparisons. Asterisks represent p-values from the multiple comparisons, with \*\* indicating a p-value of < 0.01, \*\*\*\* a p-value of < 0.0001, and ns = not significant.

**Supplementary Figure 4: Transcriptome analysis of organoid system.** RNA-Seq was performed using late-stage WT, *Bmal1*<sup>-/-</sup>, *Apc*<sup>+/-</sup>, and *Apc*<sup>+/-</sup>;*Bmal1*<sup>-/-</sup> organoids (n=3 independent organoid lines per genotype). **(A)** Principal component analysis showing the variation in overall gene expression between replicate organoid lines from all four genotypes. Scatter plot showing expression of transcripts in **(B)** *Bmal1*<sup>-/-</sup> or **(C)** *Apc*<sup>+/-</sup> compared to WT. Quantified reads are normalized per million mapped reads and log<sub>2</sub> transformed (log<sub>2</sub> RPM). **(D)** Significantly activated and suppressed KEGG pathways in *Apc*<sup>+/-</sup>;*Bmal1*<sup>-/-</sup> relative to the other three genotypes as determined by GSEA. Analysis is visualized as a dot plot with point size reflecting the number of genes in a KEGG pathway term and gene ratio as the count of differentially expressed genes in a given KEGG pathway term.

**Supplementary Figure 5: Pathway analysis of organoid transcriptome.** **(A)** Volcano plot showing -log<sub>10</sub> FDR against log<sub>2</sub> fold change of *Apc*<sup>+/-</sup>;*Bmal1*<sup>-/-</sup> relative to the other three genotypes. Genes that are suppressed in *Apc*<sup>+/-</sup>;*Bmal1*<sup>-/-</sup> with a -log<sub>10</sub> FDR greater than 30 are highlighted in red, the genes that are activated in *Apc*<sup>+/-</sup>;*Bmal1*<sup>-/-</sup> with the same FDR threshold are highlighted in blue. **(B)** Differential gene expression in NHEJ and HDR pathways. **(C)** Differential gene expression in glycolysis and glutaminolysis pathways. Genes are colored according to the DESeq2 analysis of the three genotypes versus *Apc*<sup>+/-</sup>;*Bmal1*<sup>-/-</sup>. The threshold for significance was an FDR less than 0.05.

**Supplementary Figure 6: Analysis of Wnt/ $\beta$ -Catenin signaling in organoids. (A)**  $\beta$ -Catenin IF of *Apc*<sup>+/-</sup> and *Apc*<sup>+/-</sup>;*Bmal1*<sup>-/-</sup> organoids. Scale bar = 5  $\mu$ M. **(B)** Quantification of nuclear  $\beta$ -Catenin from organoid IF (n=10,470 cells for *Apc*<sup>+/-</sup> and 12,822 cells for *Apc*<sup>+/-</sup>;*Bmal1*<sup>-/-</sup>). **(C)** Microscope images of WT organoids grown in ENR media supplemented with 10, 25, or 50% Wnt3a-conditioned media for 5 days. **(D)** Gene expression analysis of *c-Myc* and the *c-Myc* targets *Glut1*, *Hk2*, *Pkm2*, and *Got2* in organoids derived from tumor and normal surrounding epithelium (n=2 independent organoid lines). Data represent the mean  $\pm$  SEM. Significance was determined using Student's unpaired t-test. Asterisks represent p-values with \*\*\*\* indicating a p-value of < 0.0001.

**Supplementary Figure 7: Clock disruption accelerates *Apc* loss of heterozygosity. (A)** WES from early and late passage *Apc*<sup>+/-</sup>;*Bmal1*<sup>-/-</sup> organoids. Scatter plot shows log<sub>2</sub> read counts over exons of early versus late passage (n=4 independent organoid lines). **(B)** Volcano plot showing -log<sub>10</sub> FDR against log<sub>2</sub> fold change of late relative to early passage *Apc*<sup>+/-</sup>;*Bmal1*<sup>-/-</sup> organoids. Transcripts that change in exon read depth in late with a -log<sub>10</sub> FDR of 2 or more are highlighted in purple. **(C)** Point mutations in genes frequently mutated in colorectal cancer as identified using variant calling of matched early versus late passage *Apc*<sup>+/-</sup>;*Bmal1*<sup>-/-</sup> organoids. A dash indicates where no mutations were identified in that gene for that organoid line. Significant DEGs as identified by RNA-seq with an FDR threshold of 0.05 are indicated.

**Supplementary Figure 8: *c-Myc* activation in *Apc*<sup>+/-</sup>;*Bmal1*<sup>-/-</sup> organoids (A)** Gene expression analysis of *Glut1* and *Got2* in early and late-stage WT, *Bmal1*<sup>-/-</sup>, *Apc*<sup>+/-</sup>, and *Apc*<sup>+/-</sup>;*Bmal1*<sup>-/-</sup> organoids. shRNA mediated knockdown of *c-Myc* in *Apc*<sup>+/-</sup>;*Bmal1*<sup>-/-</sup> organoids. **(B)** Gene expression analysis of *c-Myc*, *Hk2*, *Pkm2*, *Glut1*, and *Got2* by qPCR (n = 3 independent experiments). **(C)** Knockdown of *c-Myc* protein abundance validated by western blot and shown relative to p84 protein abundance. **(D)** Effect of *c-Myc* knockdown on organoid formation in *Apc*<sup>+/-</sup>;*Bmal1*<sup>-/-</sup> organoids. Formation is presented as fold change relative to the shRNA control infection (n = 9 independent experiments). **(E)** Representative images of EdU staining in control and shMyc organoids. **(F)** Quantification of size in control and shMyc organoids. **(G)** Quantification of EdU positive cells in control and shMyc organoids. **(H)** Representative images of target organoids

showing bright field (upper panel), NADH intensity (middle panel) and NADH lifetime (lower panel) signal measured by fluorescence-lifetime imaging microscopy (FLIM) in WT, *Bmal1*<sup>-/-</sup>, *Apc*<sup>+/-</sup>, and *Apc*<sup>+/-</sup>;*Bmal1*<sup>-/-</sup> organoids. Data represent the mean ± SEM and statistical significance was determined using one-way ANOVA with Tukey's multiple comparisons for A and Student's unpaired t-test for B, D, F, and G. Asterisks represent p-values from the t-test or multiple comparisons, with \* indicating a p-value of < 0.05, \*\* a p-value of < 0.01, \*\*\* a p-value of < 0.001, and \*\*\*\* a p-value of < 0.0001.

**Supplementary Figure 9: Disruption of *Bmal1* rewires cellular metabolism in organoids. (A)**

Volcano plot showing -log<sub>10</sub> p-value against log<sub>2</sub> fold change of <sup>13</sup>C labeled metabolites in *Apc*<sup>+/-</sup>;*Bmal1*<sup>-/-</sup> relative to WT. Significantly decreased metabolites are highlighted blue, while significantly increased metabolites are in red. **(B)** Heatmap of significantly altered metabolites from untargeted metabolomics analysis in WT, *Bmal1*<sup>-/-</sup>, *Apc*<sup>+/-</sup>, and *Apc*<sup>+/-</sup>;*Bmal1*<sup>-/-</sup> organoids (n=3 independent organoid lines/genotype). Each column represents an individual organoid line, and each row represents a unique metabolite. Enrichment of each metabolite in a single sample is depicted according to the color scale. Hierarchical clustering is indicated on the left side and key groups of metabolites are indicated on the right. **(C)** Organoid formation and **(D)** glucose uptake assays of organoids treated with 2DG. **(E)** Organoid formation and **(F)** glucose uptake assays of organoids treated with WZB-117. Data represent the mean ± SEM and significance was determined using one-way ANOVA with Tukey's multiple comparisons. Asterisks represent p-values from the multiple comparisons, with \* indicating a p-value of < 0.05, \*\* a p-value of < 0.01 and \*\*\* a p-value of < 0.001.

**Supplementary Figure 10: Analysis of circadian rhythms in human colon tissue. (A)**

Pathological information, mutational profile and, if available, age and gender from seven patients whose colon tissue was used to create PDOs. *Bmal1*-driven luminescence monitoring of normal and tumor PDOs was used to determine period along with tumor amplitude relative to normal PDO. Amplitudes and periods were calculated using BioDare2. NR = non-rhythmic **(B)** Bright field microscopy images of organoids established from normal and tumor tissue from the same

patient. Scale bar = 100  $\mu\text{m}$ . **(C)** Detrended *Bmal1*-driven real-time bioluminescence over 72 hours from matched normal and tumor PDOs. **(D)** APC and BMAL1 protein abundance in tumor and normal matched PDOs relative to p84 abundance. **(E)** The average  $-\log_{10}(\text{p-value})$  for regressions between core clock and Wnt pathway genes. P-values were estimated based regressions from the on midweight bicorrelation coefficient.
